# Supplementary material for: TetraMabs: simultaneous targeting of four oncogenic receptor tyrosine kinases for tumor growth inhibition in heterogeneous tumor cell populations
Source: PubMed Central journal article supplement (PMC5036864; doi:10.1093/protein/gzw037), 2016-09-26
Supplement: supp_gzw037_160520_SupplFig1Sustmann.pdf [file supp_gzw037_160520_SupplFig1Sustmann.pdf]

**Supplement figure 1**

**A**

**B**

TsAb3v1

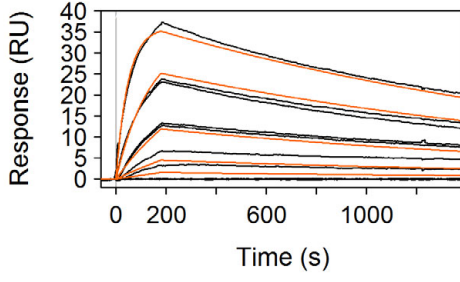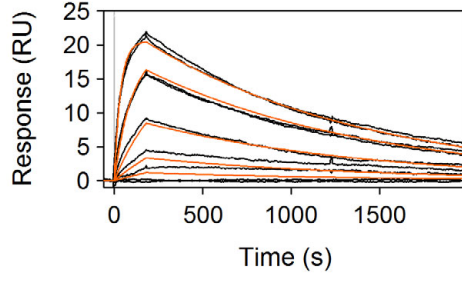

TsAb2v2

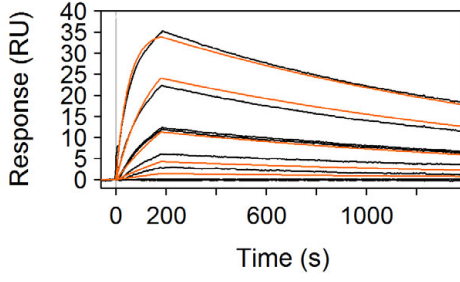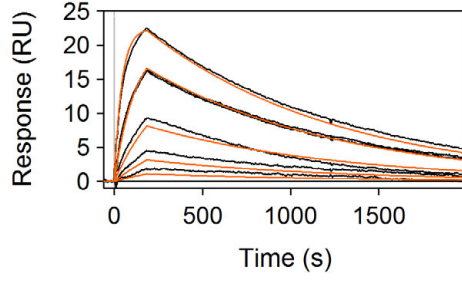

parental MAb

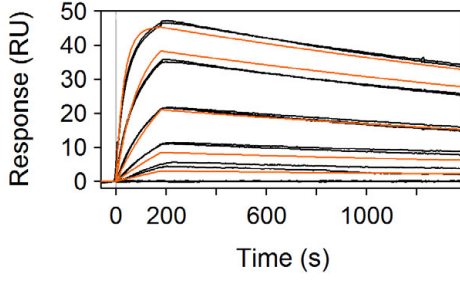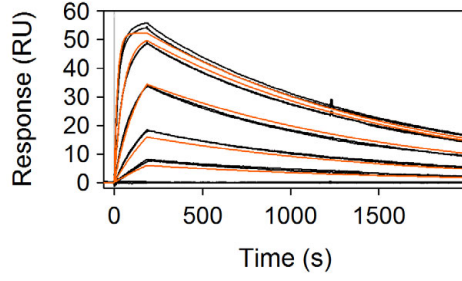

**C**

**D**

TsAb3v1

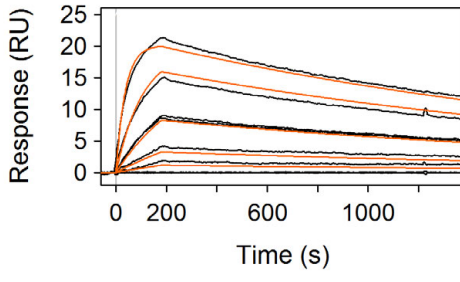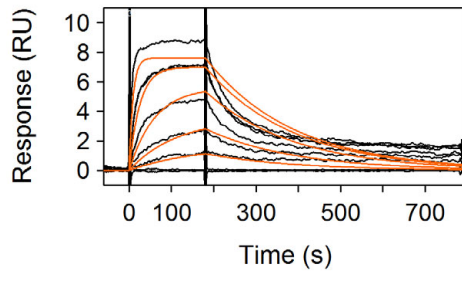

TsAb2v2

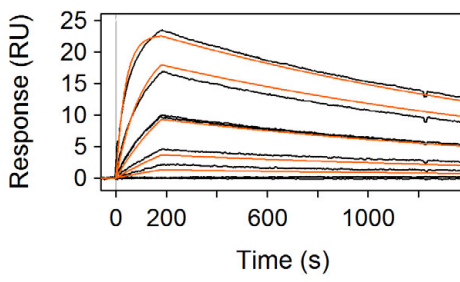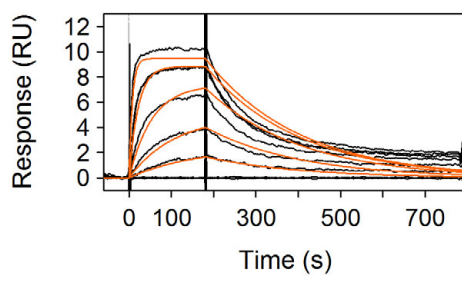

parental MAb

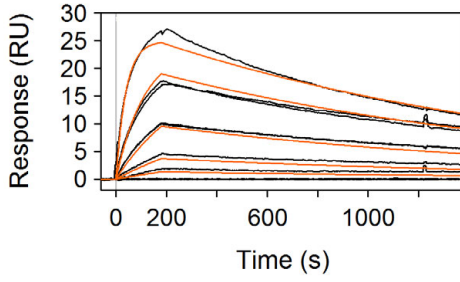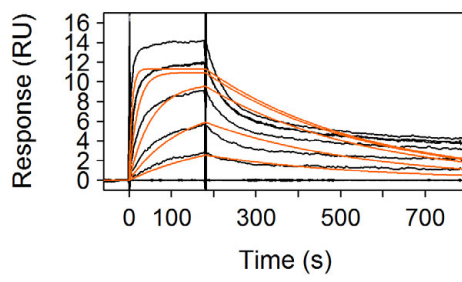

SPR-measurement: Kinetic profiles of receptors binding to captured Mabs/TsAbs; A cMet, B HER3, C EGFR, D IGF1R.
